# Supplementary material for: Effect of the Surface States of 1Cr18Ni9Ti Stainless Steel on Mn-Based Brazing Alloy Wetting
Source: MDPI journal article supplement (doi:10.3390/coatings12091328), 2022-09-12
Supplement: s1 [file s1]

Archive with 1 entries (1 files):
- coatings-1832404-supplementary.pdf
