# Supplementary material for: Effect of the Surface States of 1Cr18Ni9Ti Stainless Steel on Mn-Based Brazing Alloy Wetting
Source: MDPI journal article supplement (doi:10.3390/coatings12091328), 2022-09-12
Supplement: s1 [file s1 › coatings-1832404-supplementary.pdf]

# **Effect of the surface states of 1Cr18Ni9Ti stainless steel on Mn-based brazing alloy wetting**

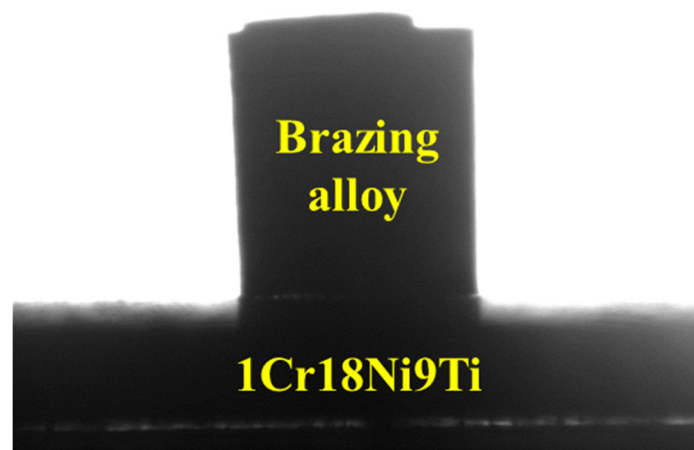

**Figure S1.** Side view of the base substrate and brazing alloy.

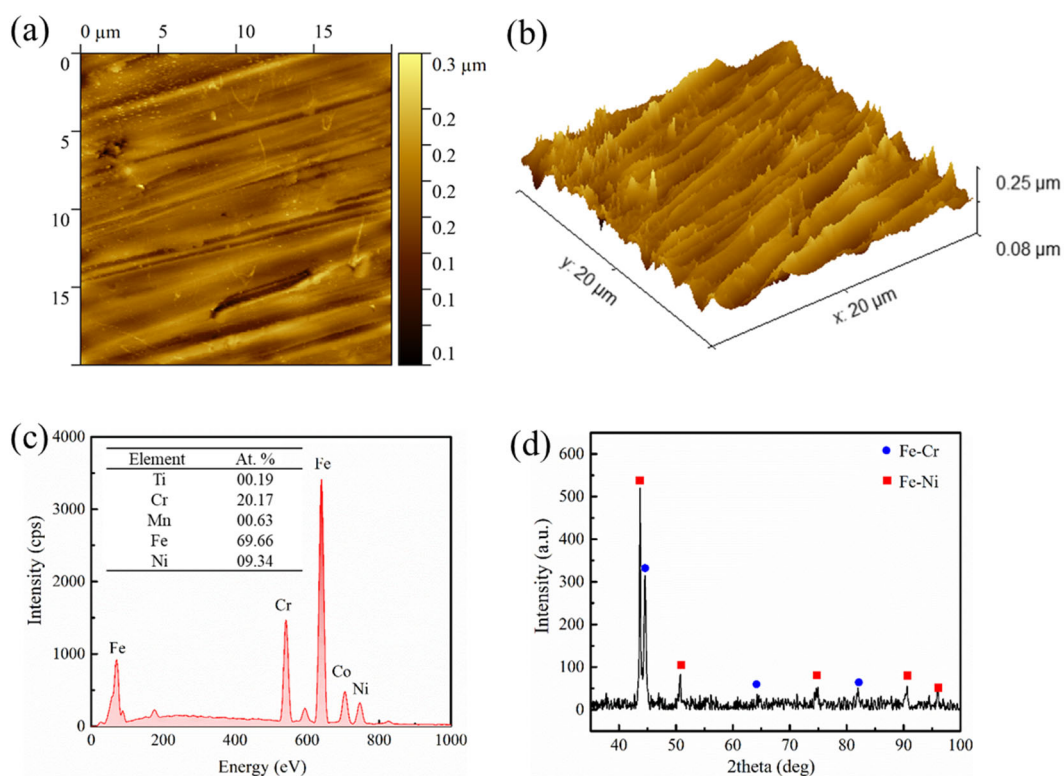

**Figure S2.** Characterization of 1Cr18Ni9Ti base substrates without surface treatment.

(a) Two-dimensional AFM image, (b) Three-dimensional AFM image, (c) EDS results, (d) XRD spectra.

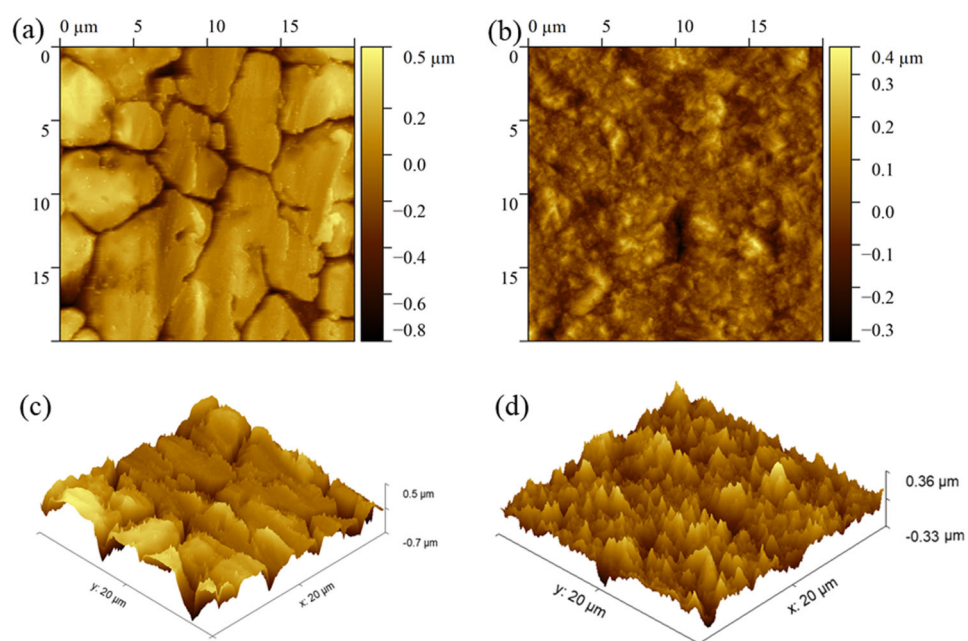

**Figure S3.** AFM images of 1Cr18Ni9Ti base substrates after surface treatment. (a)(c) Acid treatment, (b)(d) acid treatment + 4 $\mu\text{m}$  Ni.
